# Supplementary material
Source: publisher site journal article supplement (https://www.dovepress.com/article/473466)

**Supplementary Materials**

**Table S1** Details of missing values

| **Characteristics** | **The number of missing values** | **The percentage of missing values (%)** |
| --- | --- | --- |
| Age | 0 | 0.0 |
| AKI | 0 | 0.0 |
| ALB | 7 | 0.4499 |
| ALT | 7 | 0.4499 |
| AMY | 57 | 3.6632 |
| AST | 78 | 5.0129 |
| BISAP | 1 | 0.0643 |
| BMI | 53 | 3.4062 |
| BUN | 1 | 0.0643 |
| Ca | 1 | 0.0643 |
| CHD | 0 | 0.0 |
| CHOL | 284 | 18.2519 |
| CKD | 0 | 0.0 |
| COPD | 0 | 0.0 |
| CREA | 0 | 0.0 |
| CRP | 25 | 1.6067 |
| CRRT | 0 | 0.0 |
| DBIL | 7 | 0.4499 |
| DBP | 236 | 15.1671 |
| Death | 0 | 0.0 |
| DM | 0 | 0.0 |
| Etiology.G4 | 0 | 0.0 |
| GLU | 89 | 5.7198 |
| HBA1c | 1046 | 67.2237 |
| HCT | 0 | 0.0 |
| HDL | 285 | 18.3162 |
| Height | 53 | 3.4062 |
| HGB | 0 | 0.0 |
| HR | 237 | 15.2314 |
| Hypertension | 0 | 0.0 |
| ICU | 0 | 0.0 |
| LDL | 285 | 18.3162 |
| LIPASE | 170 | 10.9254 |
| LOS | 0 | 0.0 |
| LYMPH | 0 | 0.0 |
| MONO | 0 | 0.0 |
| Na | 1 | 0.0643 |
| NEUT | 0 | 0.0 |
| PA | 498 | 32.0051 |
| PCT | 241 | 15.4884 |
| PLT | 0 | 0.0 |
| RR | 239 | 15.3599 |
| SBP | 236 | 15.1671 |
| Severity.G2 | 0 | 0.0 |
| Sex | 0 | 0.0 |
| SOFA | 7 | 0.4499 |
| SpO2 | 422 | 27.1208 |
| TBIL | 7 | 0.4499 |
| Temperature | 19 | 1.2211 |
| TG | 103 | 6.6195 |
| Transfusion | 0 | 0.0 |
| Ventilation | 0 | 0.0 |
| WBC | 0 | 0.0 |
| Weight | 52 | 3.3419 |

**Abbreviations:** LOS, Length of hospital stay; DM, diabetes mellitus; CHD, coronary heart disease; COPD, chronic obstructive pulmonary disease; BMI, body mass index; SBP, systolic blood pressure; DBP, diastolic blood pressure; HR, heart rate; RR, respiratory rate; SpO2, pulse oxygen saturation; Ventilation, noninvasive or invasive mechanical ventilation; Transfusion, blood transfusion; CRRT, continuous renal replacement treatment; WBC, white blood cell count; HGB, hemoglobin; PLT, platelet count; PCT , procalcitonin; CRP, C-reactive protein; TB, total bilirubin; DB, direct bilirubin; ALB, albumin; FPG, fasting plasma glucose; AMY, amylase; PA, prealbumin; HBA1c, glycosylated hemoglobinA1c; TG, triglyceride; Ca, Calcium; BUN, blood urea nitrogen; CRE, creatinine; SOFA , sequential organ failure assessment score; BISAP, Bedside Index of Severity in Acute Pancreatitis score; AKI, Acute kidney injury; CAR, CRP to ALB ratio.

**Table S2** Univariate Logistic regression analysis for AKI

| **Characteristics** | **OR_95CI** | **P value** |
| --- | --- | --- |
| Sex | 0.534 (0.403~0.708) | <0.001 |
| Age | 1.015 (1.006~1.024) | 0.0012 |
| Death | 18.859 (6.935~51.286) | <0.001 |
| LOS | 1.025 (1.015~1.034) | <0.001 |
| ICU | 10.487 (7.685~14.309) | <0.001 |
| Hypertension | 1.632 (1.224~2.178) | <0.001 |
| DM | 1.401 (0.986~1.992) | 0.06 |
| CHD | 1.725 (1.082~2.75) | 0.022 |
| COPD | 1.672 (0.934~2.994) | 0.0836 |
| BMI | 0.979 (0.949~1.01) | 0.1914 |
| SBP | 0.99 (0.984~0.996) | 0.0011 |
| DBP | 0.987 (0.978~0.995) | 0.0026 |
| HR | 1.031 (1.024~1.038) | <0.001 |
| Temperature | 1.29 (0.962~1.73) | 0.0886 |
| RR | 1.042 (1.021~1.064) | <0.001 |
| SpO2 | 0.846 (0.809~0.886) | <0.001 |
| Ventilation | 8.015 (5.641~11.389) | <0.001 |
| Transfusion | 10.452 (7.376~14.81) | <0.001 |
| CRRT | 22.467 (13.482~37.44) | <0.001 |
| WBC | 1.07 (1.045~1.094) | <0.001 |
| HGB | 0.997 (0.992~1.002) | 0.277 |
| PLT | 0.998 (0.996~1) | 0.0197 |
| NEU | 1.074 (1.049~1.101) | <0.001 |
| PCT | 1.018 (1.012~1.024) | <0.001 |
| CRP | 1.004 (1.003~1.005) | <0.001 |
| ALB | 0.905 (0.886~0.925) | <0.001 |
| FPG | 1.059 (1.035~1.083) | <0.001 |
| PA | 1.001 (1~1.003) | 0.0855 |
| TG | 1.028 (1.008~1.047) | 0.0045 |
| HDL | 0.664 (0.509~0.865) | 0.0025 |
| Ca | 0.157 (0.094~0.263) | <0.001 |
| BUN | 1.487 (1.411~1.568) | <0.001 |
| CRE | 1.055 (1.047~1.063) | <0.001 |
| AMY | 1.001 (1~1.002) | 0.7206 |
| HBA1c | 1.041 (0.972~1.114) | 0.248 |
| BISAP | 1.845 (1.638~2.078) | <0.001 |
| Severity. severe *vs.* mild and moderate | 9.113 (6.464~12.847) | <0.001 |
| Etiology. Hyperlipidemic *vs.* biliary | 1.511 (1.092~2.092) | 0.0128 |
| Etiology. Alcoholic *vs.* biliary | 1.44 (0.685~3.026) | 0.336 |
| Etiology. Others *vs.* biliary | 8.787 (5.574~13.854) | <0.001 |
| CAR | 1.162 (1.119~1.207) | <0.001 |

**Abbreviation:** LOS, Length of hospital stay; DM, diabetes mellitus; CHD, coronary heart disease; COPD, chronic obstructive pulmonary disease; BMI, body mass index; SBP, systolic blood pressure; DBP, diastolic blood pressure; HR, heart rate; RR, respiratory rate; SpO2, pulse oxygen saturation; Ventilation, noninvasive or invasive mechanical ventilation; Transfusion, blood transfusion; CRRT, continuous renal replacement treatment; WBC, white blood cell count; HGB, hemoglobin; PLT, platelet count; NEU, neutrophil count; PCT , procalcitonin; CRP, C-reactive protein; ALB, albumin; FPG, fasting plasma glucose; AMY, amylase; PA, prealbumin; HBA1c, glycosylated hemoglobin A1c; TG, triglyceride; Ca, Calcium; BUN, blood urea nitrogen; CRE, creatinine; SOFA, sequential organ failure assessment score; BISAP, Bedside Index of Severity in Acute Pancreatitis score; AKI, Acute kidney injury; CAR, CRP to ALB ratio; CI, confidence interval; OR, odds ratio; P < 0.05 was considered statistically significant.

**Table S3** Comparison of AUCs of biomarkers for prediction of AKI

| **Variable** | **AUC-ROC** | **95% CI** |
| --- | --- | --- |
| CAR | 59.48% | 54.63% ~ 64.32% |
| NLR | 56.87% | 52.15% ~ 61.59% |
| MLR | 57.95% | 53.12% ~ 62.78% |
| PLR | 53.38% | 48.17% ~ 58.59% |
| HAPS | 68.65% | 65.23% ~ 72.06% |
| BISAP | 68.45% | 64.21% ~ 72.68% |
| SOFA | 74.67% | 70.32% ~ 79.02% |

**Abbreviation:** CAR, C-reactive protein to albumin ratio; NLR, neutrophil to lymphocyte ratio; MLR, monocyte to lymphocyte ratio; PLR, platelet to lymphocyte ratio; HAPS, harmless acute pancreatitis score; BISAP, Bedside Index of Severity in Acute Pancreatitis score; SOFA, sequential organ failure assessment score.

**Figure** S1. Adjusted dose-response association between severities (mild and moderate vs. severe) of AP and AKI. Solid lines represent the odds ratio of AKI and dotted lines represent the corresponding 95% CI. ORs were adjusted for variates with model 2. OR = 1 was set as the reference line.


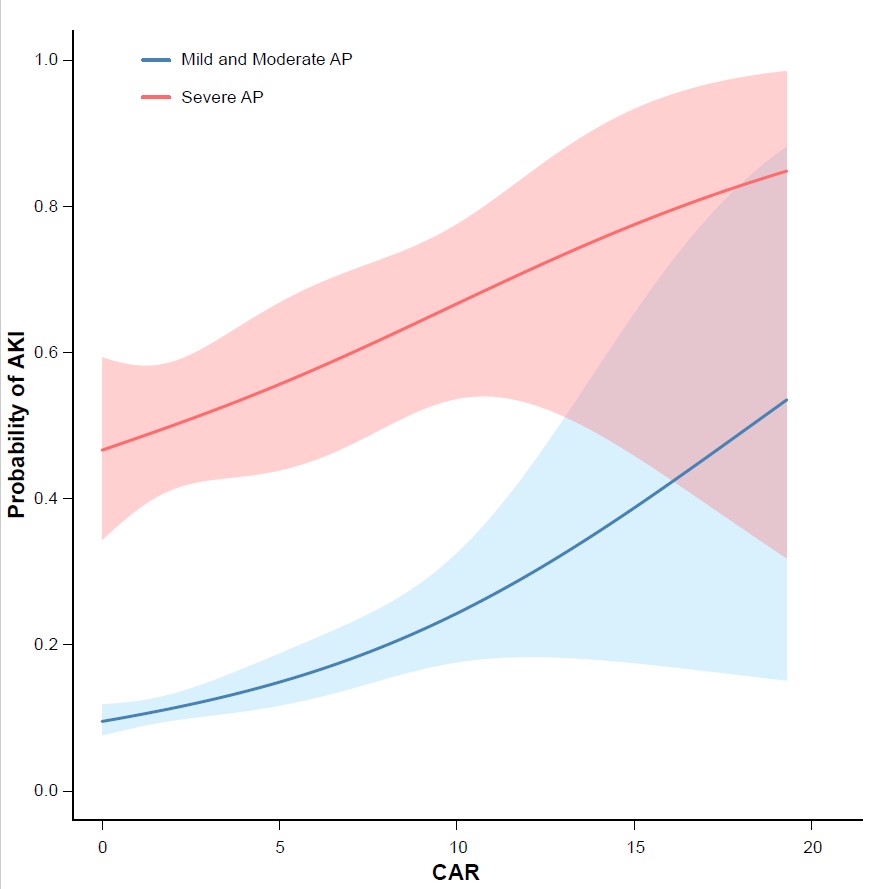

Supplement: Supplementary file 1 [file get_supplementary_file.php]
